# Supplementary material for: The decision to germinate is regulated by divergent molecular networks in spores and seeds
Source: PubMed Central journal article supplement (PMC4950004; doi:10.1111/nph.14018), 2016-06-03
Supplement: NPH-211-952-s001.pdf [file NPH-211-952-s001.pdf]

***New Phytologist* Supporting Information Figs S1 & S2 and Table S1**

Article title: The decision to germinate is regulated by divergent molecular networks in spores and seeds

Authors: Eleanor F. Vesty, Younousse Saidi, Laura A. Moody, Daniel Holloway, Amy Whitbread, Sarah Needs, Anushree Choudhary, Bethany Burns, Daniel McLeod, Susan J. Bradshaw, Hansol Bae, Brian Christopher King, George W. Bassel, Henrik Toft Simonsen and Juliet C. Coates

Article acceptance date: 16 April 2016

The following Supporting Information is available for this article:

**Fig. S1** Moss bioactive gibberellins promote *Physcomitrella* spore germination.

**Fig. S2** Gibberellins that are bioactive in *Physcomitrella* cannot rescue the *Arabidopsis gal-3* mutant seed germination phenotype and substitute for GA<sub>3</sub>.

**Table S1** Primers used for RT-PCR analysis

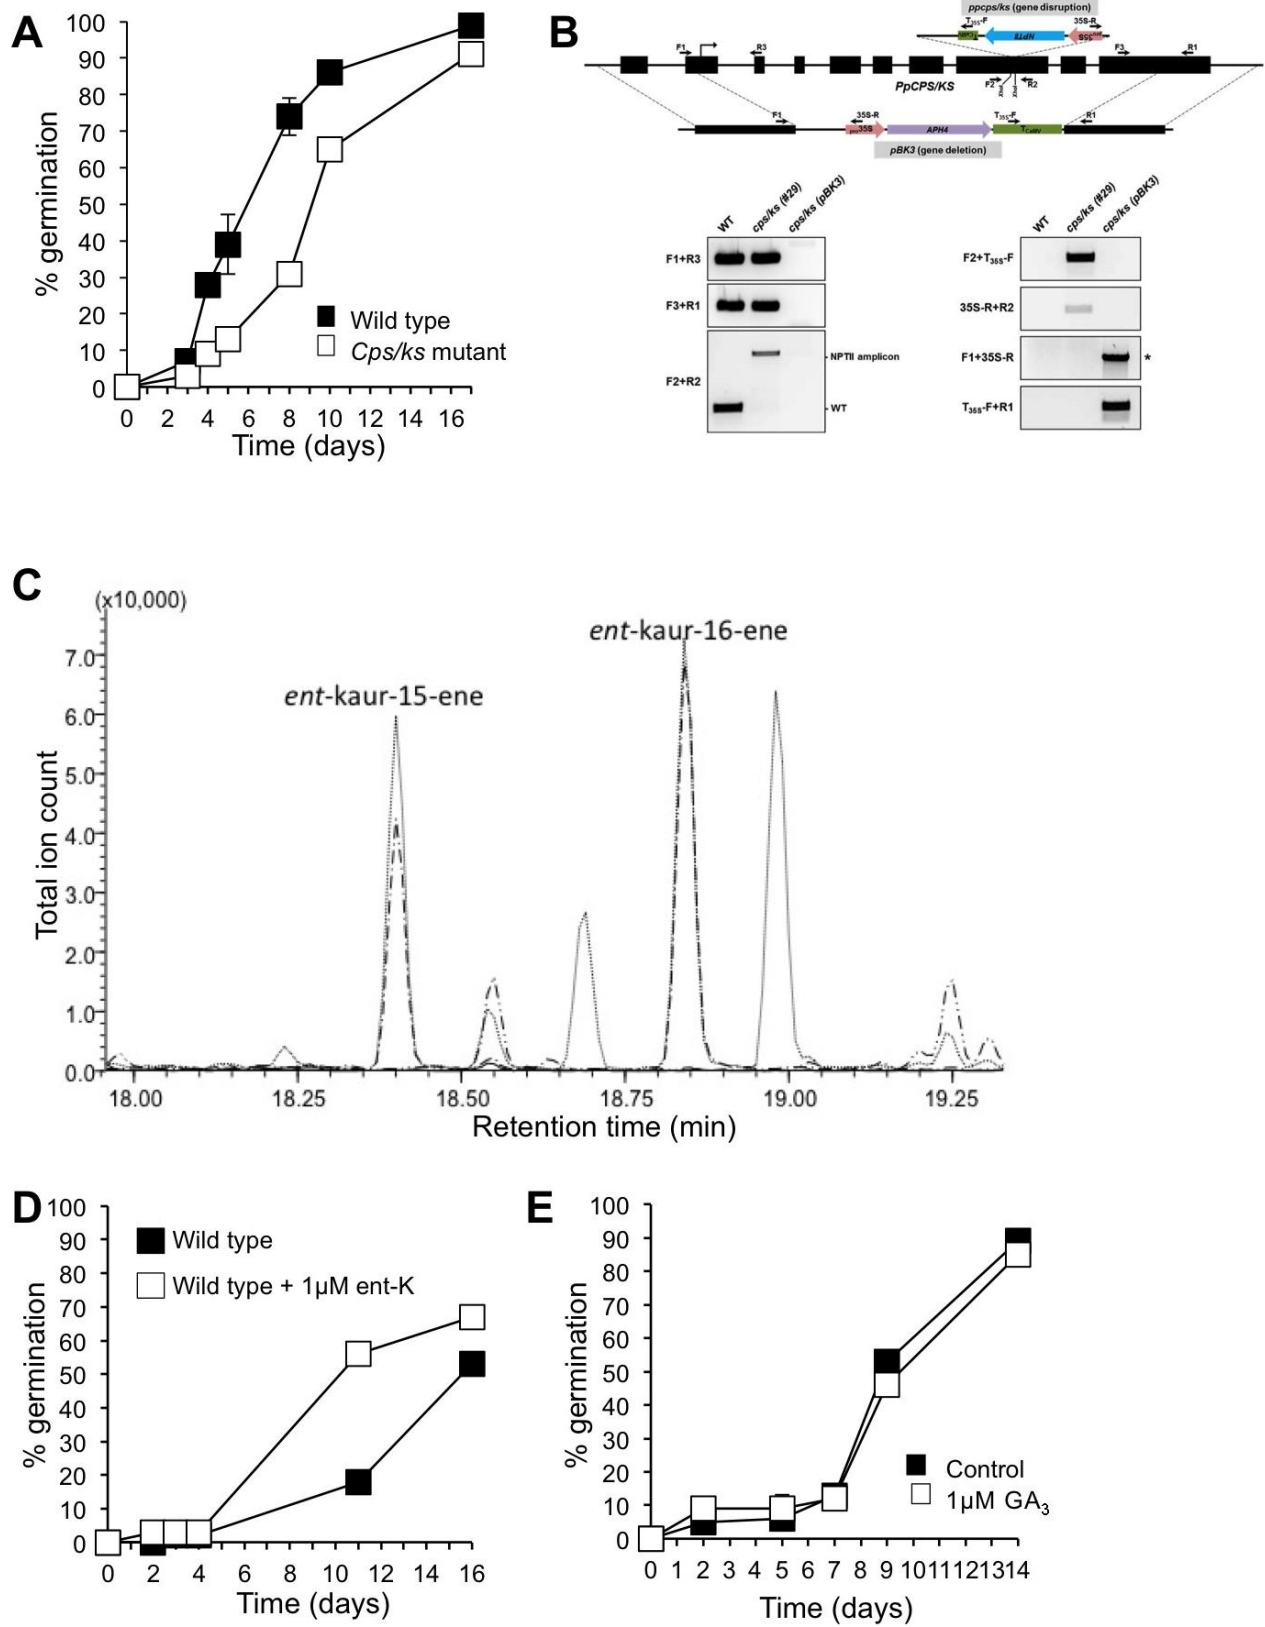

**Fig. S1** Moss bioactive gibberellins promote *Physcomitrella* spore germination. (a) *Ppcps/ks*

mutant (pBK3 targeted gene replacement) shows slower germination than wild type. Error bars  $\pm$  SEM. (b) Genotyping of pBK3 *cps/ks* gene replacement mutant compared to the *Ppcps/ks* disruption line 29 (Zhan *et al.*, 2015) and wild type. (c) Lack of diterpenes in both *Ppcps/ks* mutants compared to wild type. The figure shows that the two major peaks produced by the CPS/KS enzyme, *ent*-kaur-15-ene and *ent*-kaur-16-ene, are not in either mutant. Narrow dotted line, wild type spores; alternate dashed and dotted line, wild type green tissue; alternate dashed and two-dotted line, *Ppcps/ks* pBK3; solid line, *Ppcps/ks* #29 gene disruption. The two additional major peaks in wild type spores are unknown, non-terpenoid compounds. (d) *ent*-kaurene promotes germination in wild-type spores. (e) GA<sub>3</sub> cannot promote germination in wild-type spores.

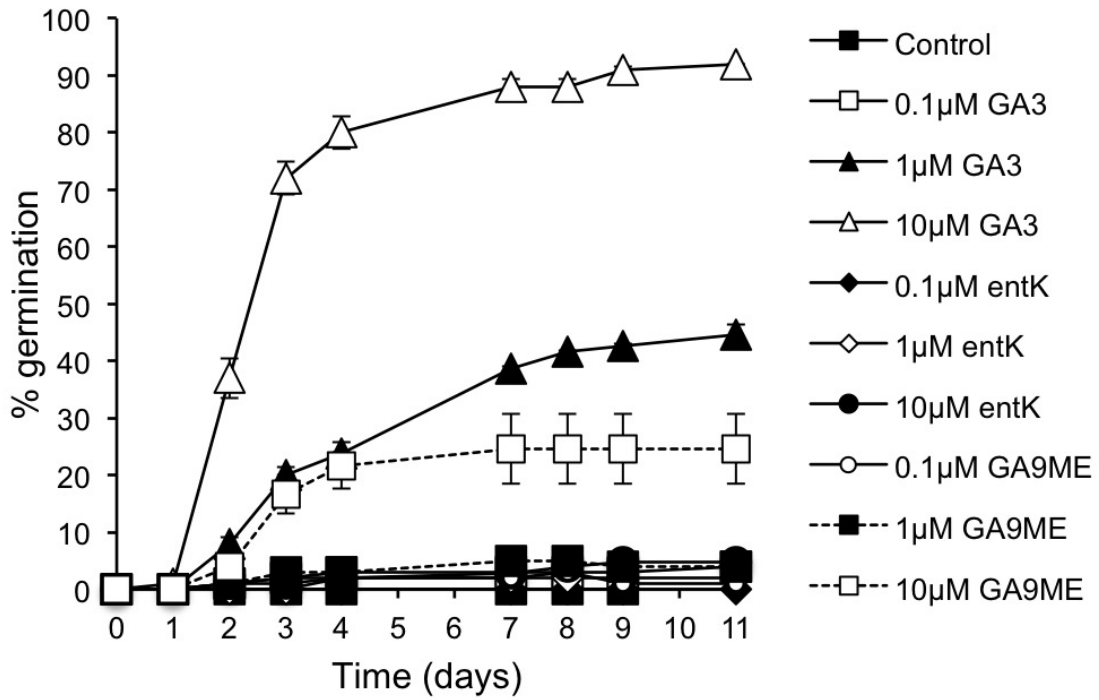

**Fig. S2** Gibberellins that are bioactive in *Physcomitrella* cannot rescue the *Arabidopsis gal-3* mutant seed germination phenotype and substitute for GA<sub>3</sub>. *gal-3* seeds were plated on 0.5 MS medium and germination (radicle emergence) was scored in the control (methanol solvent) and in seeds treated with different gibberellins (solvent-matched) as shown. Error bars  $\pm$  SEM.

**Table S1** Primers used for RT-PCR analysis; the gene that the primer hybridizes to is indicated, along with whether it is a forward (fwd) or reverse (rvs) primer

| <b>Sequence</b>        | <b>Name</b>             |
|------------------------|-------------------------|
| AACAAGAGTTGCACATGGCGTA | PpDELLAa fwd            |
| GGTGGCAGACTAAGCAGCTC   | PpDELLAa rvs            |
| CTGGAGAACAACGCGATGGC   | PpDELLAb fwd            |
| CCCTCGCTGGATAGATTCCG   | PpDELLAb rvs            |
| CTCTATTACCATGGAGGCGGA  | GLP1 GID1-like fwd      |
| CCGAATATCTCATCTCCCAATC | GLP1 GID1-like rvs      |
| TTATTACTACCACGGAGGCGGG | GLP2 GID1-like fwd      |
| CTCCGCAAATCGCATCTCCCAA | GLP2 GID1-like rvs      |
| GGATGTATGGGTGCGTCTTTTC | GLP3 GID1-like fwd      |
| TGCGTATCTCGTCTCCCAGTC  | GLP3 GID1-like rvs      |
| CTGCCCAGGCGAGCTCCGG    | GLP4 GID1-like fwd      |
| GAACATATGGACGCCATCCTCG | GLP4 GID1-like rvs      |
| CCCAATCACTCCCGGGCCGT   | GLP5 GID1-like fwd      |
| AGCTCCGCGACTACGACCAGA  | GLP5 GID1-like rvs      |
| AATGCAGGCGGTGAGAGTCCC  | GLP6 GID1-like fwd      |
| GGGATCTTTGCCACCTACAA   | GLP6 GID1-like rvs      |
| CATGGCTGCCCAACTTCCCG   | PpGAMYB1 fwd            |
| GAGCGGACTAGGATTGGTAATC | PpGAMYB1 rvs            |
| TTGATGCCTTAATGCAGGATGC | PpGAMYB2 fwd            |
| GCGGAGCACACGGAACAGG    | PpGAMYB2 rvs            |
| CACAGACTTCCGATACCCATGG | CPS fwd                 |
| GCCTTGGCATCTTCCATCATCG | CPS rvs                 |
| CCTTCGCCTTGCAGCAGGTG   | ent-kaurene oxidase fwd |
| AGCGCACATCCTCTTTCCAGC  | ent-kaurene oxidase rvs |
| ATGGCTTCCAGCACCTTGATAC | PpCPS/KS fwd            |
| TCAGGTACTGGCTCGAAGAGC  | PpCPS/KS rvs            |
| AGACCGTCCGGAGGTGACTG   | PpABI1a fwd             |

|                         |                       |
|-------------------------|-----------------------|
| GCGGACTCAACTTCCTCTGCT   | PpABI1a rvs           |
| TATGCCTGGTGACTTATAACCAG | PpABI1b fwd           |
| CTCGCTCTGGCTTGTGATCC    | PpABI1b rvs           |
| CGGTTGATGGTTGAGGGCGA    | PpABI3A fwd           |
| GGCCAAAACCTGTATCGAATGT  | PpABI3A rvs           |
| GAAATGAGAAAAGTCCCTGCCC  | PpABI3b fwd           |
| TCGGCCAGAACCTGTATCTGAT  | PpABI3b rvs           |
| CAGCAGCAGAGGCAGAGGCG    | PpABI3C fwd           |
| TGCGCCCCTTCTGTTTCAGCA   | PpABI3C rvs           |
| TCAGAACTTGTTTGAGGGGATC  | ABA2 Phypa125575 fwd  |
| GCTGGCACAGTATGTGTGGG    | ABA2 Phypa125575 rvs  |
| CTACAGCATGTGGCATCTCCG   | ABA2 Phypa202254 fwd  |
| ACTCGAATACCGTAACCCGCAT  | ABA2 Phypa202254 rvs  |
| TCCTTTCCGGAGAGCCAACC    | AAO3 Phypa106708 fwd  |
| TGTCGTCACTATGCCCTCAGA   | AAO3 Phypa106708 rvs  |
| GGGCACGCACAATGTAACGTCA  | AAO3 Phypa140802 fwd  |
| GCACCTTCAACCTGTCCGACG   | AAO3 Phypa140802 rvs  |
| GAGAAACAGGGGCGGCCGGA    | Phypa209242 fwd       |
| GCCGCTGGTTTCTCGTTGGAG   | Phypa209242 rvs       |
| GATGCTACCCACCCCGCCA     | Phypa222359 fwd       |
| CCCCTCTCCATATCTAAGCATT  | Phypa222359 rvs       |
| CGTCACAGGGCAGCGGCG      | Phypa132509 fwd       |
| CAGGTGCAAATTACAGTACTGG  | Phypa132509 rvs       |
| AGGAGGAGCACGCGTACGCA    | Phypa213389 fwd       |
| GGACGCTGTGAGCACGCAAG    | Phypa213389 rvs       |
| GTGAAGGACATTGGGTTCGGG   | SnRK2 Phypa195464 fwd |
| CGGGATCCTCAAACGGATATG   | SnRK2 Phypa195464 rvs |
| TTCGAAGTCCTCCTTGTTGCAC  | SnRK2 Phypa194508 fwd |
| CCCACATCGGGATCCGCATC    | SnRK2 Phypa194508 rvs |
| TCCTCCTGTACTIONGCTTCTGG | SnRK2 Phypa106968 fwd |
| CGCTCAAGATACGTCCAATGG   | SnRK2 Phypa106968 rvs |

|                       |                       |
|-----------------------|-----------------------|
| ACTCGGGAGCTTGTTGCGGTG | SnRK2 Phypa215231 fwd |
| GGACCCCAACCATCCCCCTC  | SnRK2 Phypa215231 rvs |
| TGTGCTGTTGGACAATGAG   | Pptub fwd             |
| ACATCAGATCGAACTTGTG   | Pptub rvs             |

## References

- Zhan X, Bach SS, Hansen NL, Lunde C, Simonsen HT. 2015.** Additional diterpenes from *Physcomitrella patens* synthesized by copalyl diphosphate/kaurene synthase (PpCPS/KS). *Plant Physiol Biochem* **96**: 110–114.
